# Supplementary material
Source: HighWire-hosted journal article supplement (https://www.annfammed.org/highwire/filestream/637/field_highwire_adjunct_files/0/Hay_Supp_Apps.pdf)
Supplement: Hay_Supp_Apps.pdf [file Hay_Supp_Apps.pdf]

**Supplemental materials for:**

Hay AD, Anderson E, Ingle S, Beck C, Hollingworth W. Respiratory tract infections in children in the community: prospective online inception cohort study. *Ann Fam Med.* 2019;17(1):14-22.

WEB APPENDIX TABLE AND FIGURES

Web Table 1. Representativeness of children in cohort

|                                | Invited, not enrolled (N = 9,832) | Enrolled (N = 485) | Chi-squared p-value |
|--------------------------------|-----------------------------------|--------------------|---------------------|
| <b>Age, years median (IQR)</b> | <b>6 (3–10)</b>                   | <b>4 (3–7)</b>     | <b>&lt;0.001*</b>   |
| <b>Female, N (%)</b>           | <b>4,824 (49.1%)</b>              | <b>245 (50.5%)</b> | <b>0.53</b>         |
| <b>IMD decile, N (%):</b>      |                                   |                    | <b>&lt;0.001</b>    |
| <i>1 (most deprived)</i>       | 2301 (23.4)                       | 42 (8.7)           |                     |
| 2                              | 889 (9.1)                         | 44 (9.1)           |                     |
| 3                              | 1316 (13.4)                       | 43 (8.9)           |                     |
| 4                              | 1151 (11.7)                       | 59 (12.2)          |                     |
| 5                              | 339 (3.5)                         | 16 (3.3)           |                     |
| 6                              | 352 (3.6)                         | 46 (9.5)           |                     |
| 7                              | 960 (9.8)                         | 65 (13.4)          |                     |
| 8                              | 1640 (16.7)                       | 109 (22.5)         |                     |
| 9                              | 395 (4)                           | 25 (5.2)           |                     |
| <i>10 (least deprived)</i>     | 485 (4.9)                         | 36 (7.4)           |                     |

\*Wilcoxon rank-sum p value

Four children in not-enrolled group had missing data for age and IMD decile.  
Seven children in enrolled group were not in original mailout invitation list

**Web Appendix Figure 1. Mean symptoms' severity (among children reporting that symptom, among children with exclusively upper respiratory tract infection symptoms) where day 1 is the RTI start date.**

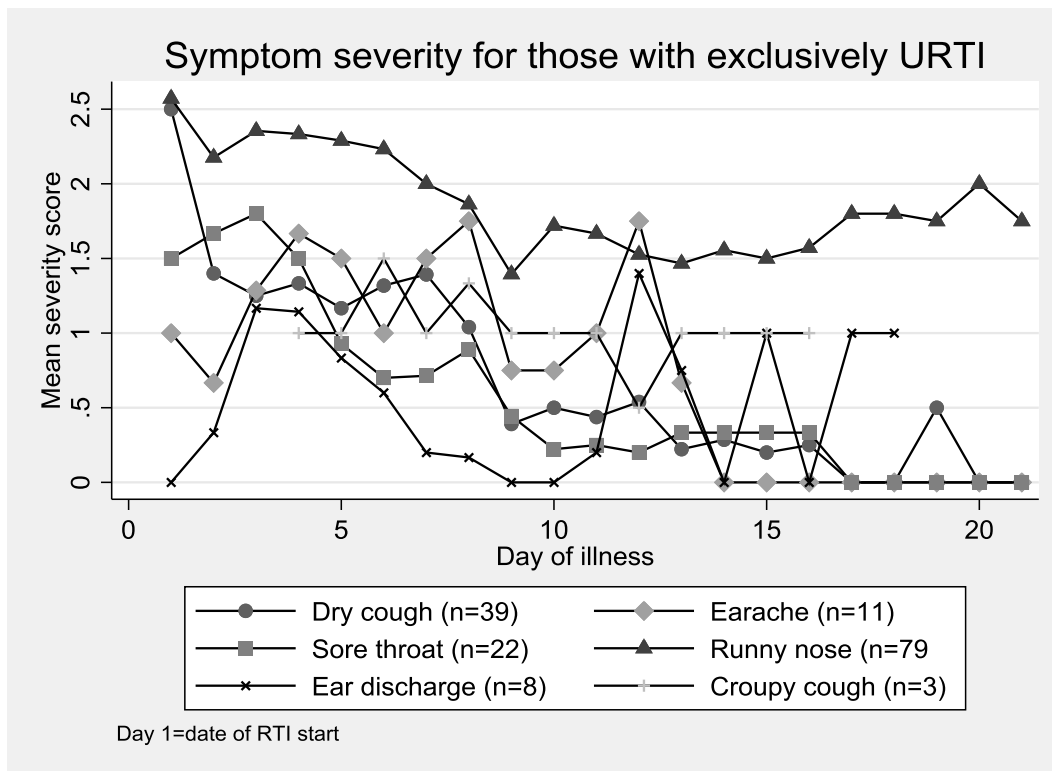

Symptom severity scored using Likert scale: zero (normal or no problem) to six (as bad as it could be).

**Web Appendix Figure 2a. Mean symptoms' severity (among children reporting that symptom, among children with any lower respiratory tract infection symptom) where day 1 is the RTI start date.**

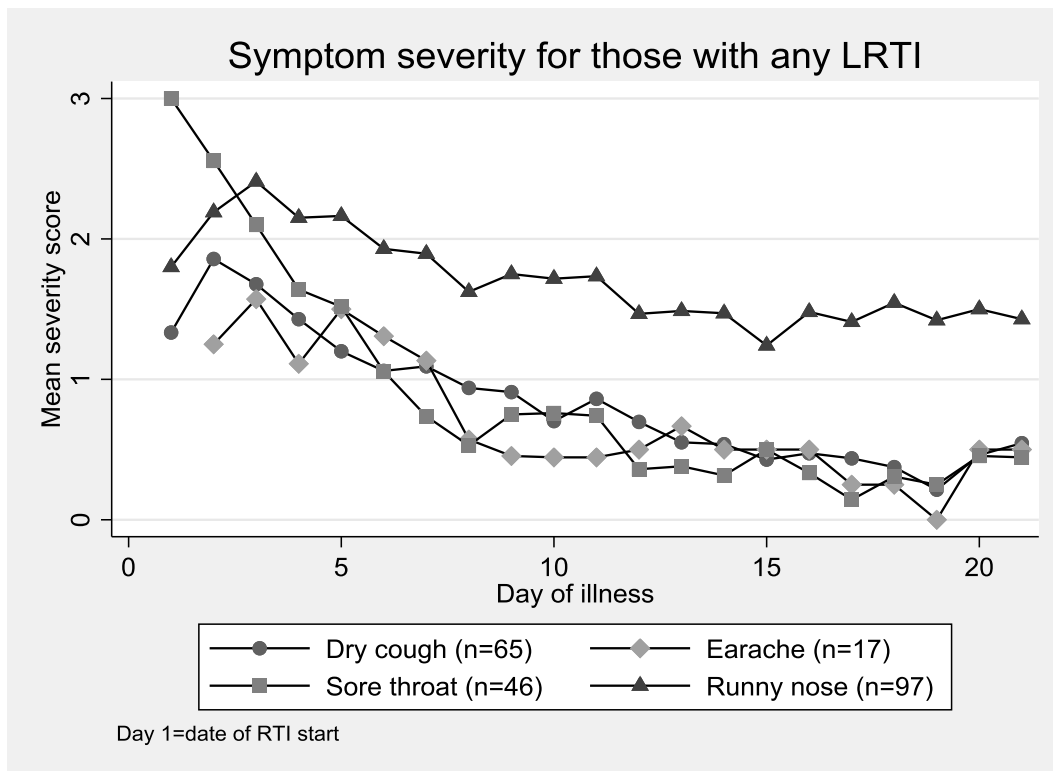

Symptom severity scored using Likert scale: zero (normal or no problem) to six (as bad as it could be).

**Web Appendix Figure 2b. Mean symptoms' severity (among children reporting that symptom, among children with any lower respiratory tract infection symptom) where day 1 is the RTI start date.**

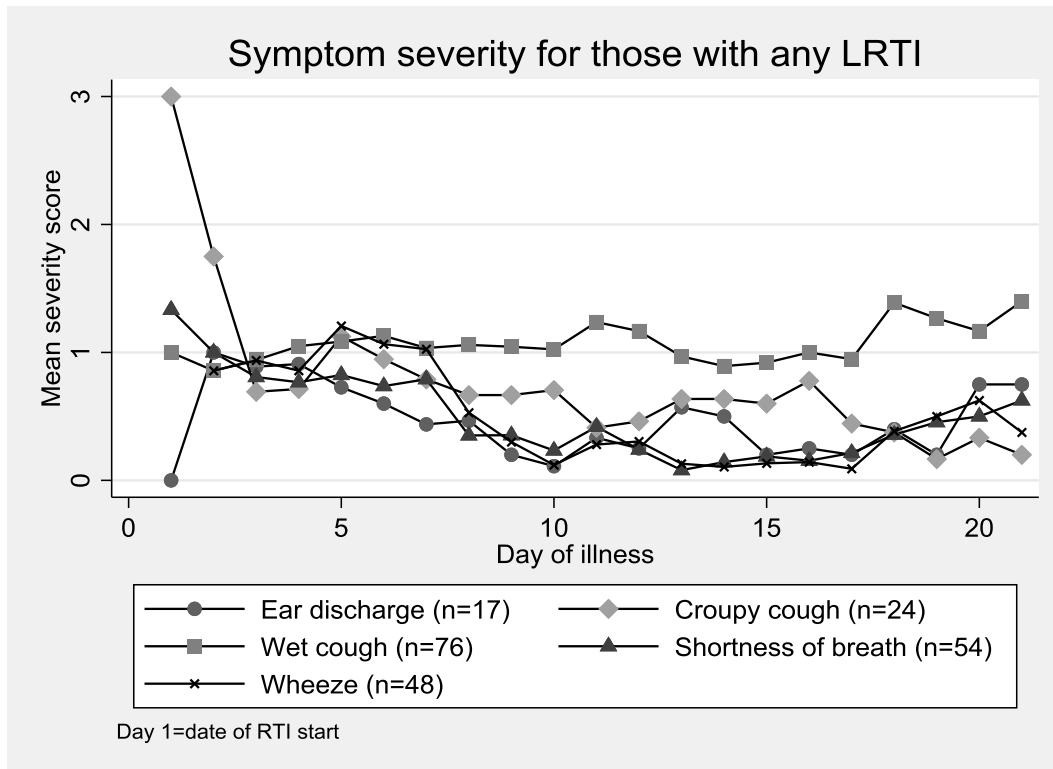

Symptom severity scored using Likert scale: zero (normal or no problem) to six (as bad as it could be).
